# Supplementary material
Source: ML conference proceedings conference paper supplement (https://proceedings.neurips.cc/paper_files/paper/2022/hash/00d1f03b87a401b1c7957e0cc785d0bc-Abstract.html)
Supplement: Supplementary file 1 [file 00d1f03b87a401b1c7957e0cc785d0bc-Supplemental-Conference.zip]

Archive with 2 entries (2 files):
- neurips22supmat.pdf
- __MACOSX/._neurips22supmat.pdf
